# Supplementary material for: Heart Failure Detection in Electrocardiograms Using Artificial Intelligence
Source: Research Square preprint supplement (doi:10.21203/rs.3.rs-5716430/v1), 2025-01-10
Supplement: Supplementary file 1 [file dcb924044a0468010899a111.pdf]

Table 1: Confusion matrix containing all 60 clinically validated cases chosen from the population with EF>50%, NT-proBNP < 125 ng/L and no ICD-10 HF diagnosis.

|                 |     | Validated HFpEF |    | Total |
|-----------------|-----|-----------------|----|-------|
|                 |     | Yes             | No |       |
| Predicted HFpEF | Yes | 24              | 6  | 30    |
|                 | No  | 3               | 27 | 30    |
| Total           |     | 27              | 33 | 60    |

Table 2: All 60 clinically validated cases chosen from the population with EF > 50%, NT-proBNP < 125 ng/L and no ICD-10 HF diagnosis. The list is sorted by model-predicted risk which can be interpreted as the estimated probability of HF. Some comments were shortened to preserve patient privacy.

| Predicted risk | HFpEF | Comment                                                                                     |
|----------------|-------|---------------------------------------------------------------------------------------------|
| 0.88           | Yes   | Dilated left atrium                                                                         |
| 0.88           | Yes   | Atrial flutter, borderline enlarged left atrium                                             |
| 0.87           | Yes   | Dilated left atrium and short EDT                                                           |
| 0.87           | Yes   | Dilated left atrium and short EDT                                                           |
| 0.84           | Yes   | High filling pressure                                                                       |
| 0.8            | Yes   | Both atria enlarged and myocardial infarction                                               |
| 0.79           | No    | Slightly elevated EDT and estimated SPAP                                                    |
| 0.79           | Yes   | Acute atrial fibrillation                                                                   |
| 0.77           | Yes   | Dilated left atrium and elevated E/e'                                                       |
| 0.75           | Yes   | Atrial fibrillation + pulmonary hypertension                                                |
| 0.73           | Yes   | Elevated pulmonary pressure and filling pressure in the left ventricle moderate AI and MI   |
| 0.73           | Yes   | Elevated E/e' and increased pulmonary pressure                                              |
| 0.73           | Yes   | High filling pressures and severe aortic stenosis                                           |
| 0.72           | Yes   | Significantly enlarged atria with mild to severe aortic stenosis and pulmonary hypertension |
| 0.68           | Yes   | Significantly enlarged atria with severe aortic stenosis and hypertrophy                    |
| 0.65           | No    | Pacemaker rhythm                                                                            |
| 0.63           | Yes   | Significantly enlarged atria on both sides                                                  |
| 0.62           | Yes   | Large left atrium and elevated E/e'                                                         |
| 0.6            | Yes   | Right-sided HF                                                                              |
| 0.6            | No    | Mechanical mitral valve with low gradient due to prolapse                                   |
| 0.58           | Yes   | Mildly enlarged left atrium and elevated pulmonary pressure, right-sided HF                 |
| 0.58           | Yes   | Biological aortic valve with high filling pressures                                         |
| 0.58           | Yes   | Enlarged left atrium with low E/A ratio and dilated ascending aorta                         |
| 0.56           | No    | Hypokinesia in the apex after STEMI                                                         |
| 0.56           | Yes   | Diastolic dysfunction with enlarged left atrium                                             |
| 0.55           | Yes   | LVH with a dilated left atrium                                                              |
| 0.55           | Yes   | Severe aortic stenosis with elevated E/e' and significant atrial enlargement                |
| 0.54           | No    | Acute MI with occluded RCA                                                                  |
| 0.52           | No    | Good left-sided function but increased right-sided pressure                                 |
| 0.52           | Yes   | Dilated left atrium                                                                         |
| 0.0            | No    | Athlete's heart with enlarged left atrium                                                   |
| 0.0            | No    | Normal                                                                                      |
| 0.0            | No    | Normal                                                                                      |
| 0.0            | Yes   | Systemic sclerosis with probable lung involvement and right-sided HF                        |
| 0.0            | Yes   | Enlarged left atrium with low EDT and high E/e'                                             |
| 0.0            | No    | Normal                                                                                      |
| 0.0            | No    | Normal                                                                                      |
| 0.0            | No    | Normal                                                                                      |
| 0.0            | No    | Three-vessel disease and mild hypokinesia                                                   |
| 0.0            | No    | Normal                                                                                      |
| 0.0            | No    | Normal but but symptomatic coronary artery stenosis that was stented                        |
| 0.0            | No    | Normal                                                                                      |
| 0.0            | No    | Normal                                                                                      |
| 0.0            | No    | Right-sided HF with elevated pulmonary pressure                                             |
| 0.0            | No    | Normal                                                                                      |
| 0.0            | No    | Normal except at aorta ascendens                                                            |
| 0.0            | No    | Normal                                                                                      |
| 0.0            | No    | Normal                                                                                      |
| 0.0            | No    | Moderate aortic stenosis                                                                    |
| 0.0            | No    | Athlete's heart without signs of HF                                                         |
| 0.0            | No    | Previous SCAD                                                                               |
| 0.0            | No    | Small AI                                                                                    |
| 0.0            | No    | Previous NSTEMI                                                                             |
| 0.0            | No    | Non acute SCAD                                                                              |
| 0.0            | No    | Mildly enlarged left atrium and borderline elevated pulmonary pressure                      |
| 0.0            | Yes   | LVH due to hypertension                                                                     |
| 0.0            | No    | Bicuspid valve                                                                              |
| 0.0            | No    | Anxiety                                                                                     |
| 0.0            | No    | Spasm angina                                                                                |
| 0.0            | No    | Acute MI                                                                                    |
